# Supplementary material
Source: PubMed Central journal article supplement (PMC1458908)

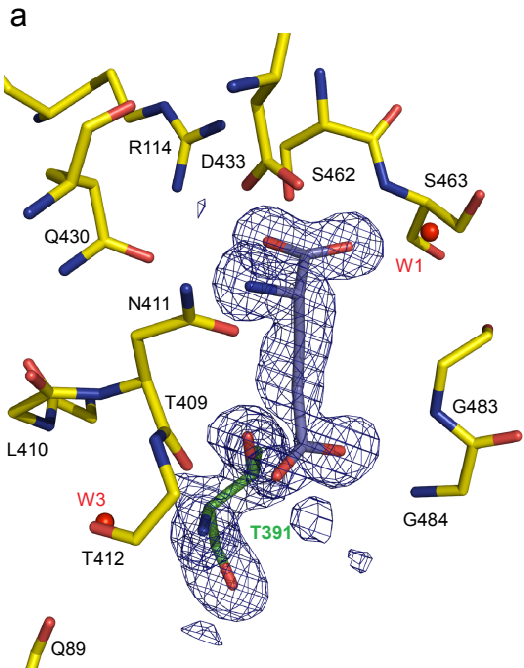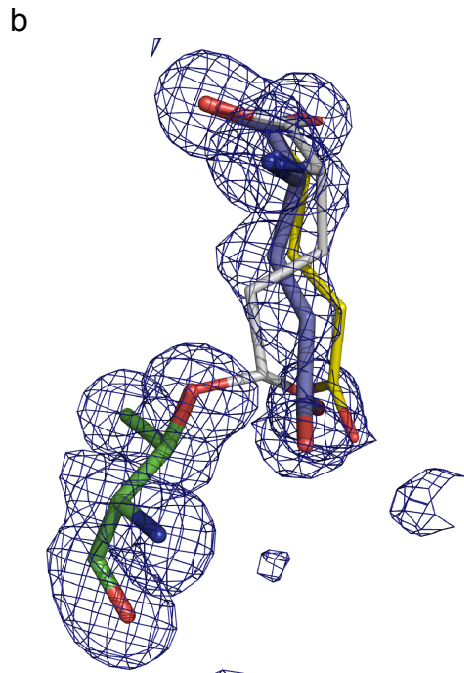

Supplement: pnas_0511020103_1.pdf [file pnas_0511020103_1.pdf]
